# Supplementary material
Source: ML conference proceedings conference paper supplement (https://proceedings.neurips.cc/paper_files/paper/2022/hash/d3221cdb27e49d9c1cd35ad254feccfe-Abstract.html)
Supplement: Supplementary file 1 [file d3221cdb27e49d9c1cd35ad254feccfe-Supplemental-Conference.zip]

Archive with 2 entries (2 files):
- code-link.txt
- NeurIPS_2022-supplementary.pdf
