# Supplementary material
Source: ML conference proceedings conference paper supplement (https://proceedings.neurips.cc/paper_files/paper/2022/hash/d3221cdb27e49d9c1cd35ad254feccfe-Abstract.html)
Supplement: Supplementary file 1 [file d3221cdb27e49d9c1cd35ad254feccfe-Supplemental-Conference.zip › code-link.txt]

https://github.com/huangzy225/3D-GCL
